# Supplementary material for: Tracing the contribution of dust sources on deposition and phytoplankton carbon uptake in global oceans
Source: Copernicus journal article supplement (doi:10.5194/egusphere-2025-763), 2025-03-06
Supplement: Supplementary file 1 [file egusphere-2025-763-supplement.pdf]

Supplementary information for:

**Tracing the contribution of dust sources on deposition and  
phytoplankton carbon uptake in global oceans**

Yaxin Liu <sup>a</sup>, Yunting Xiao <sup>a</sup>, Lehui Cui <sup>a</sup>, Qinghao Guo <sup>a</sup>, Yiyang Sun<sup>a</sup>, Pingqing Fu<sup>a</sup>, Cong-qiang  
Liu<sup>a</sup>, Jialei Zhu <sup>a,\*</sup>

<sup>a</sup> Institute of Surface-Earth System Science, School of Earth System Science, Tianjin University,  
Tianjin 300072, China

\* Corresponding author.

Email address: [zhujialei@tju.edu.cn](mailto:zhujialei@tju.edu.cn)

Contents of this file  
Supplementary Figures 1 to 11

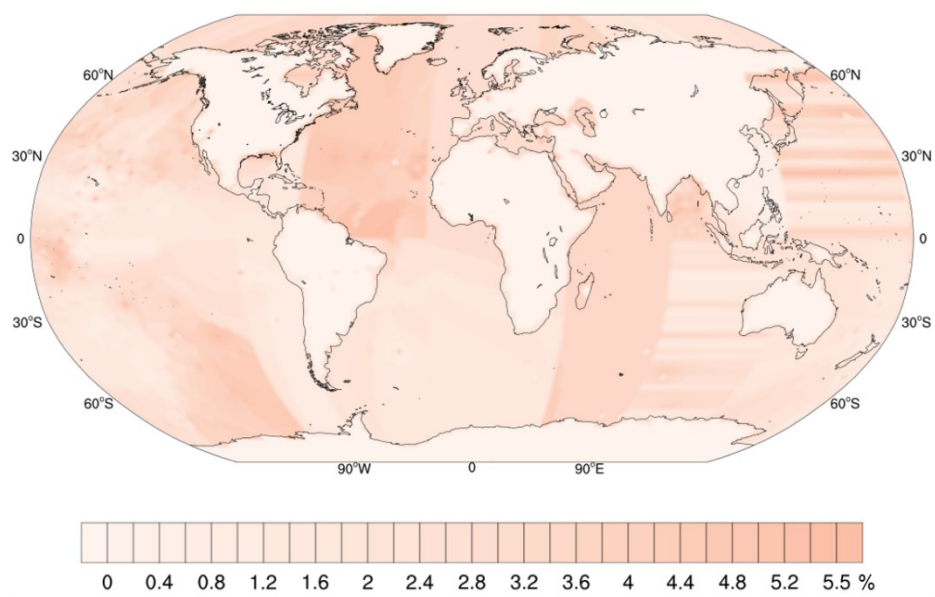

Fig. S1 The interpolated iron solubility data.

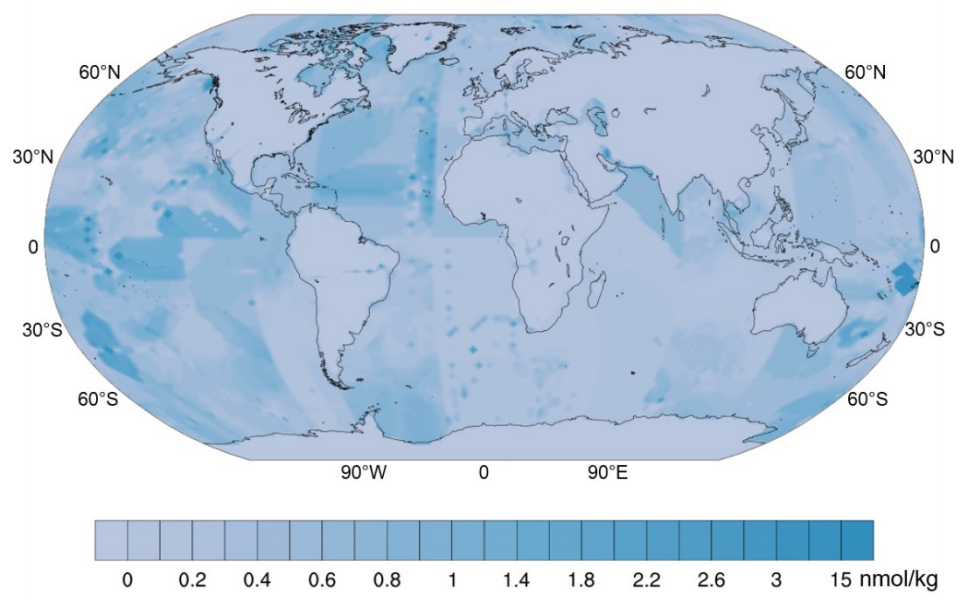

Fig. S2 The interpolated dissolved iron data.

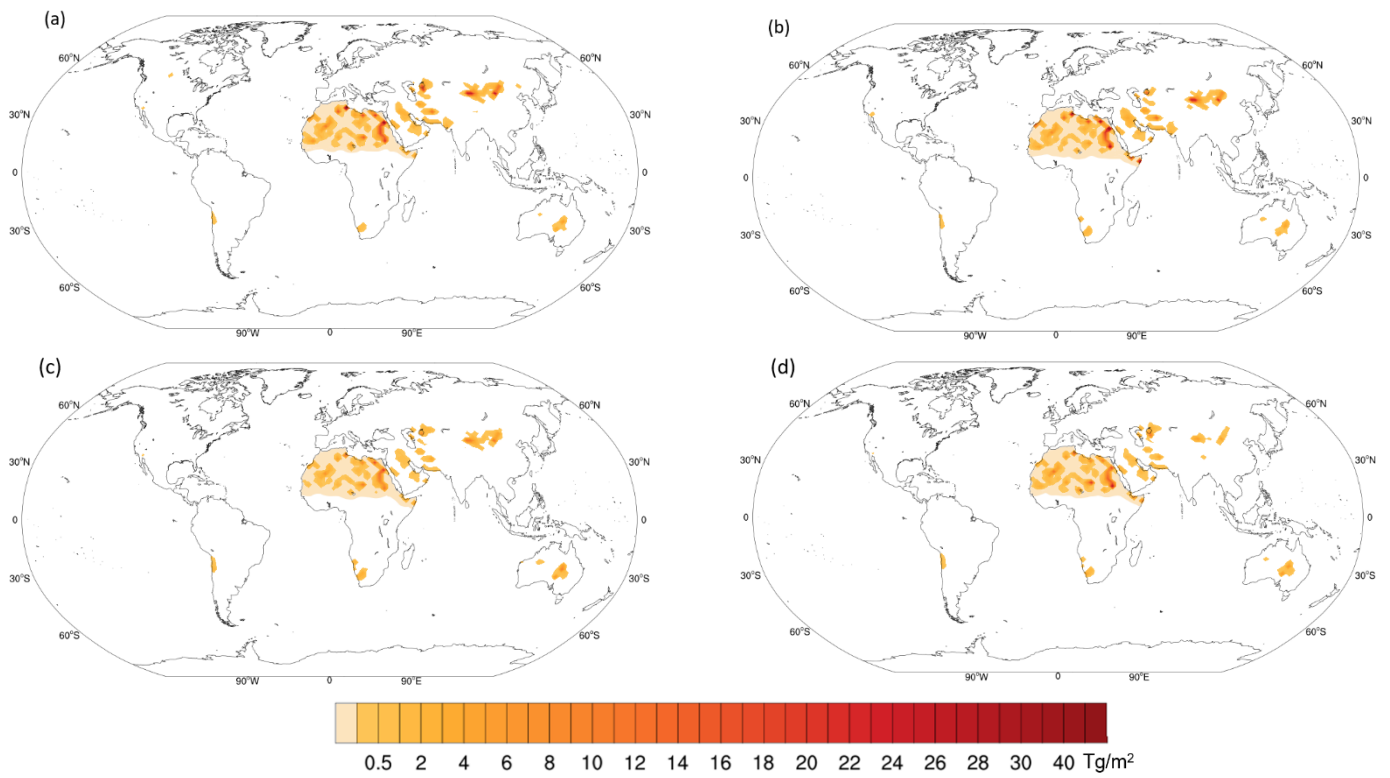

Fig.S3 Seasonal distribution of dust emission from global main dust source regions  
(a) spring; (b) summer; (c) autumn; (d) winter

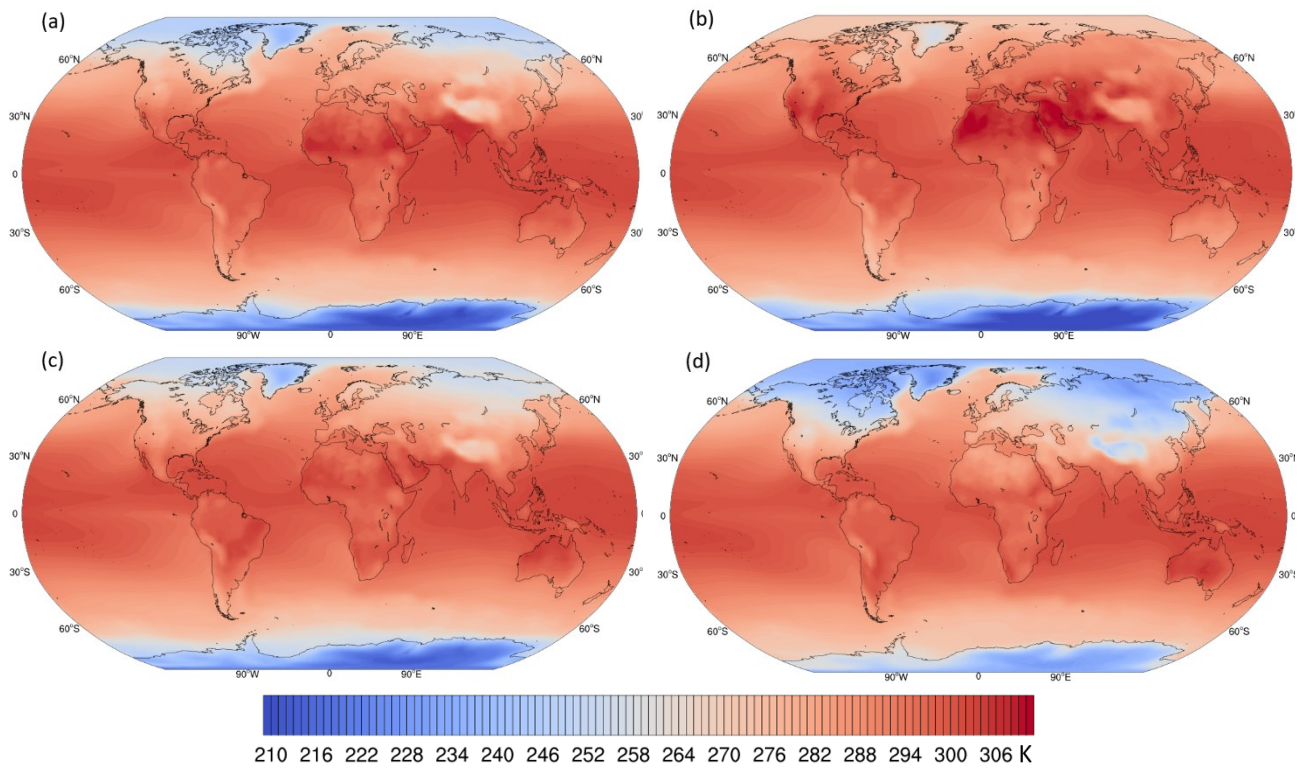

Fig.S4 Seasonal characteristics of global surface temperature  
(a) spring; (b) summer; (c) autumn; (d) winter

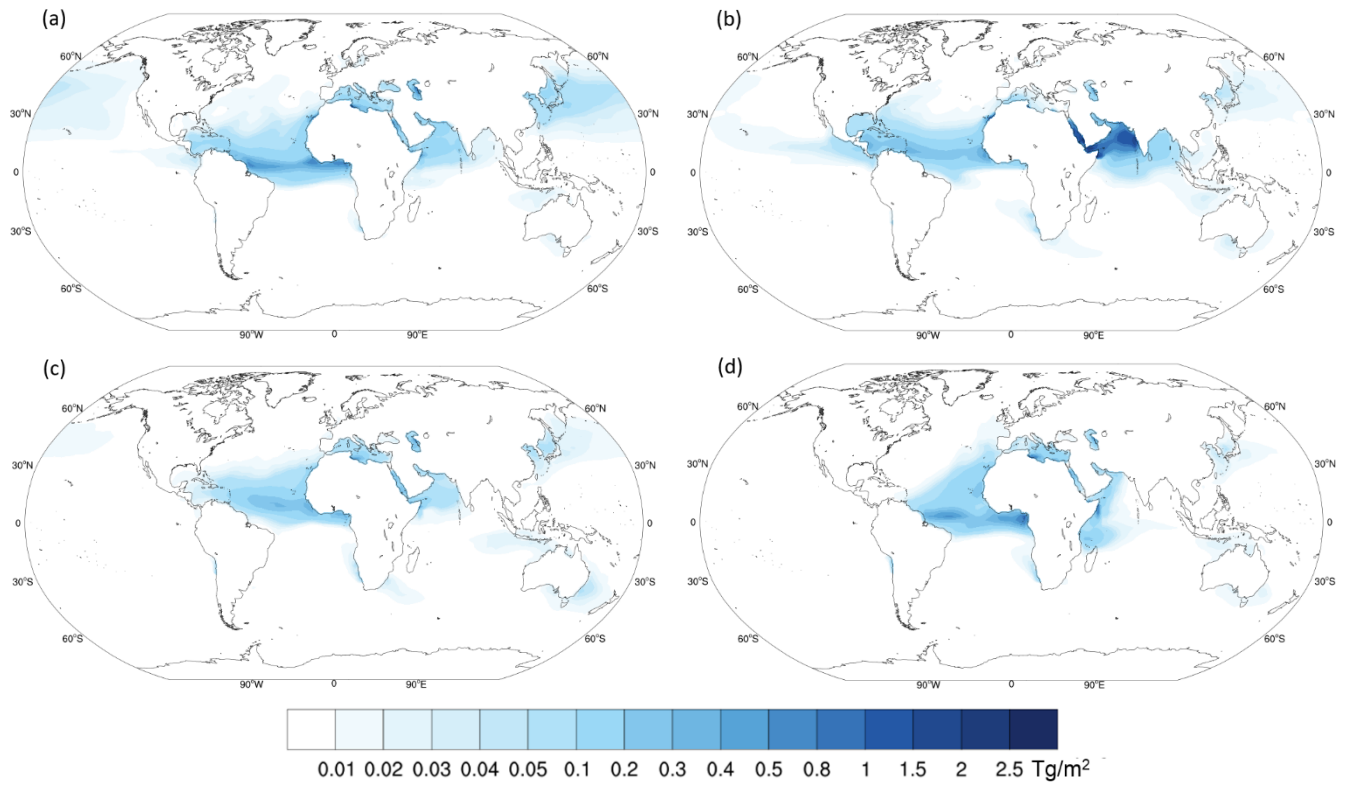

Fig.S5 Seasonal distribution of global marine dust deposition  
 (a) spring; (b) summer; (c) autumn; (d) winter

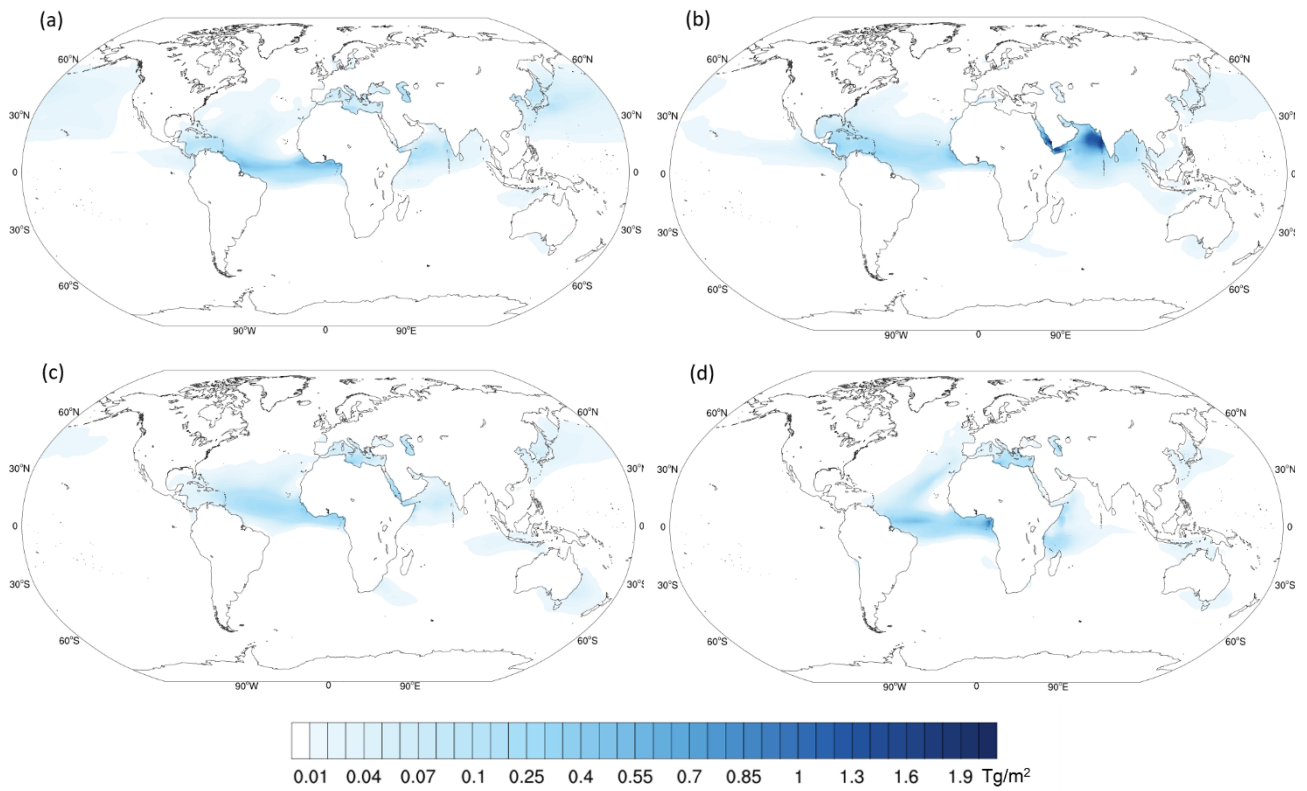

Fig.S6 Seasonal distribution of global marine dust wet deposition  
(a) spring; (b) summer; (c)autumn; (d) winter

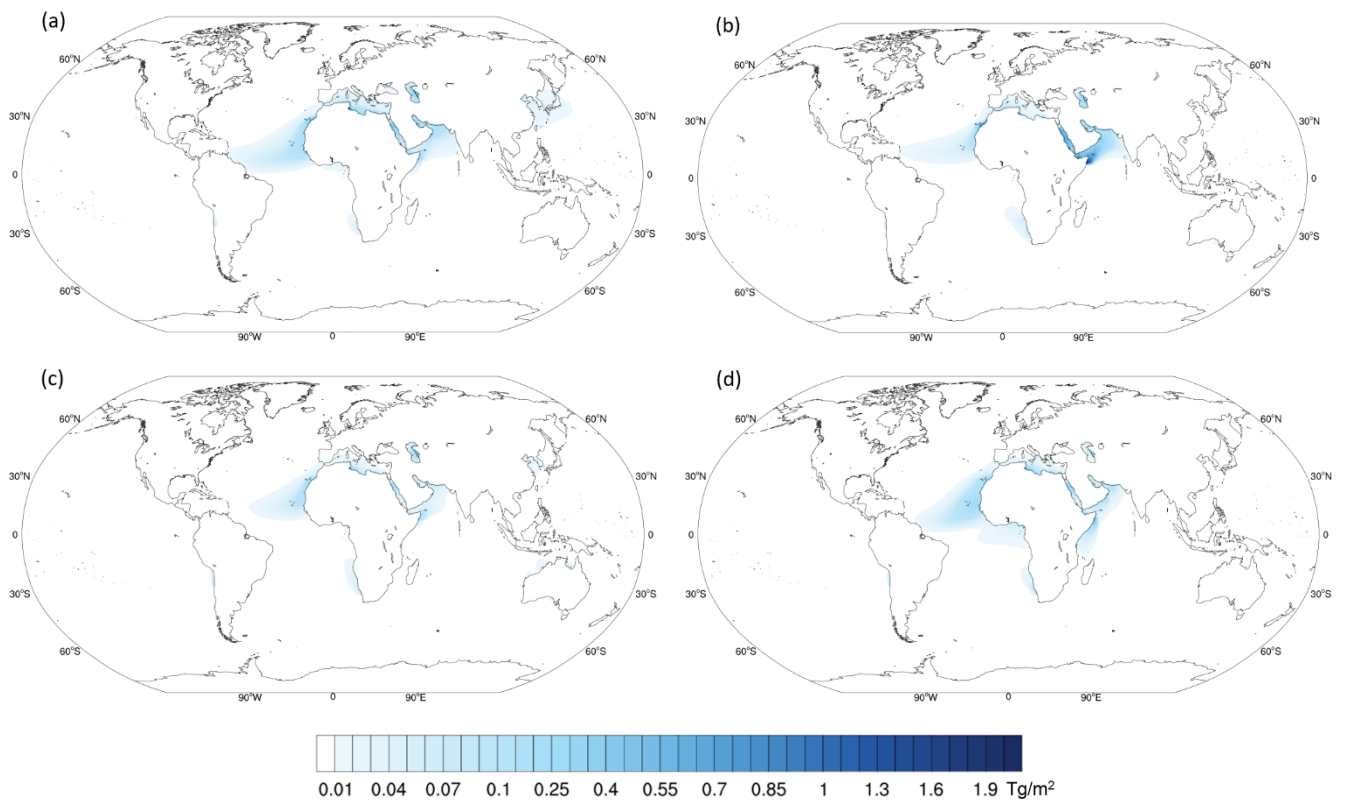

Fig.S7 Seasonal distribution of global marine dust dry deposition  
(a) spring; (b) summer; (c) autumn; (d) winter



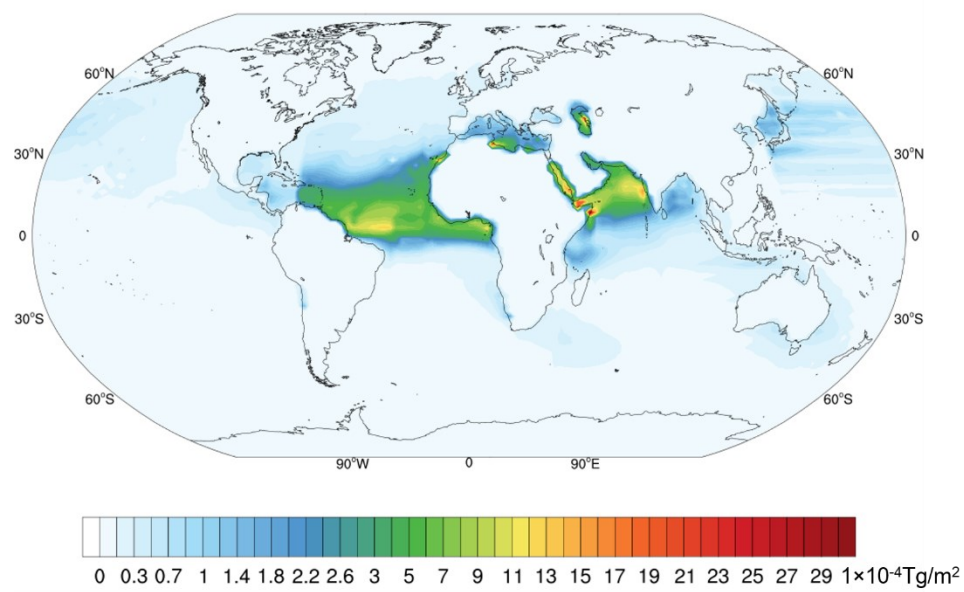

Fig. S8 The spatial distribution of dissolved iron supplied by dust deposition over global oceans

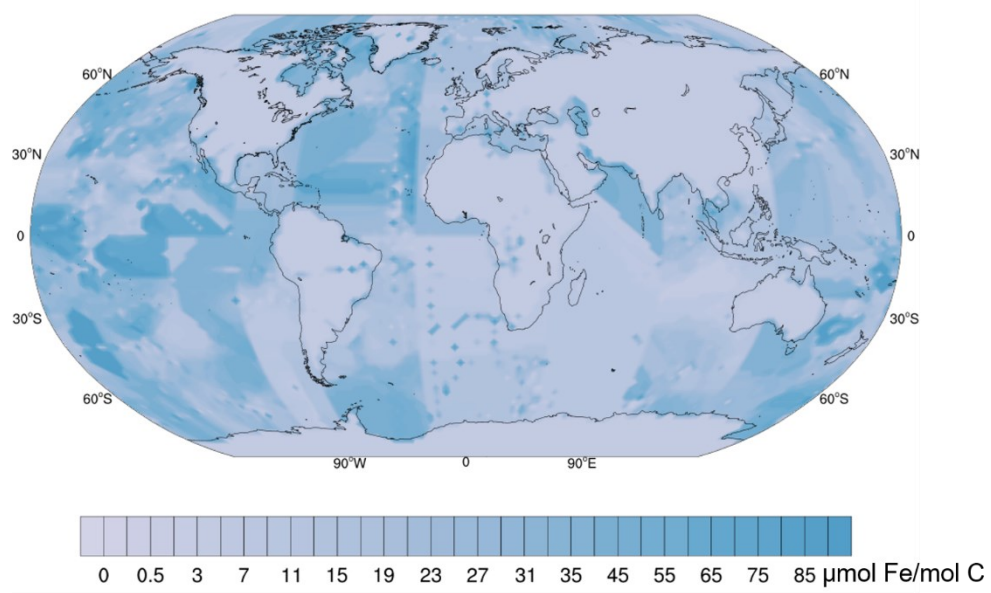

Fig. S9 The Fe: C ratio in global oceans

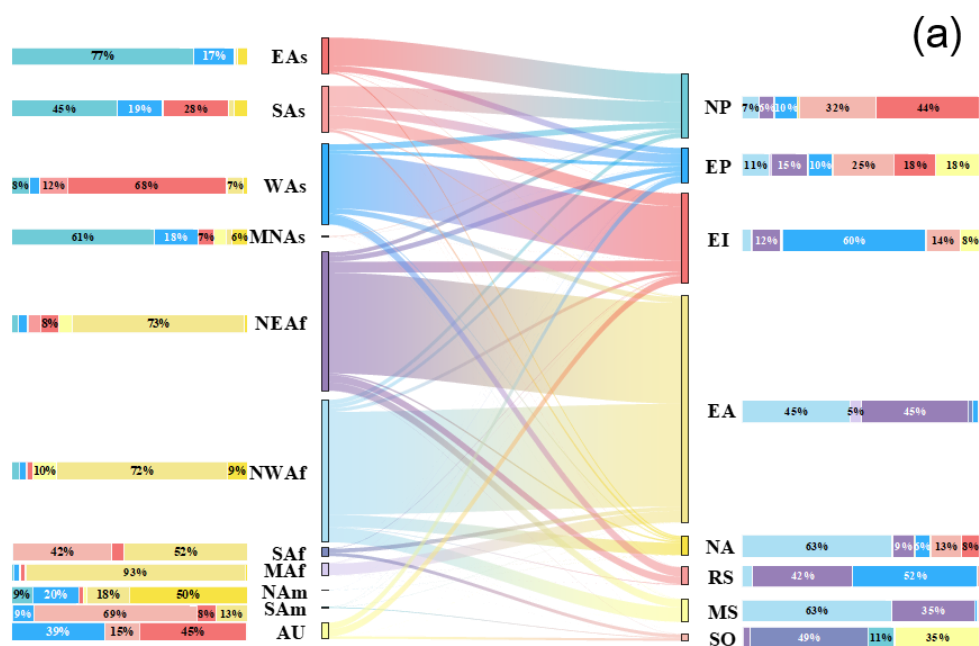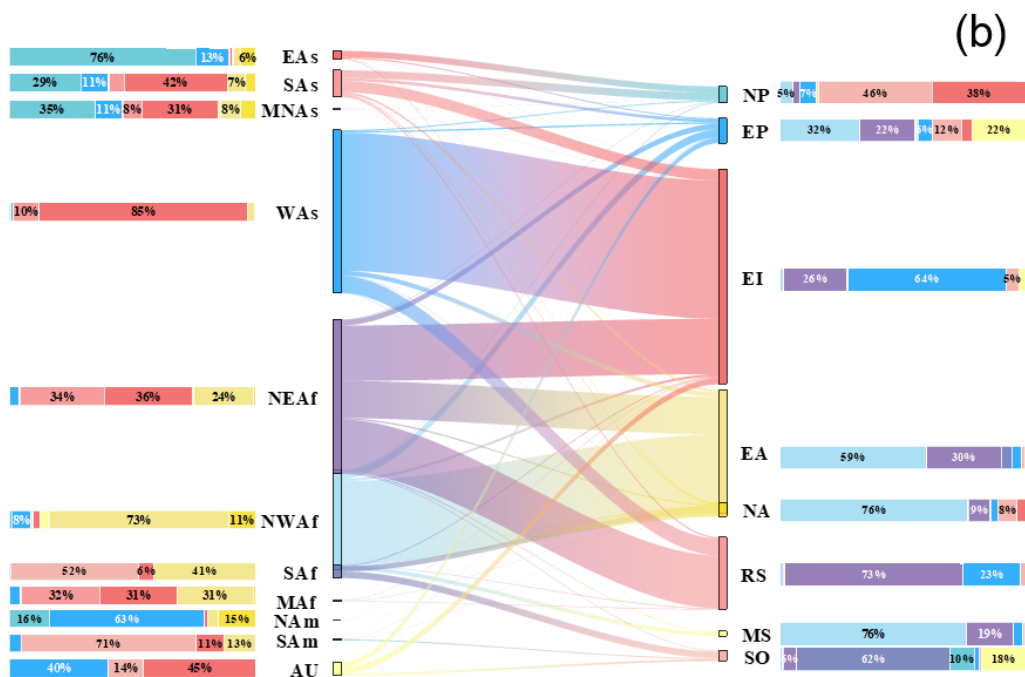

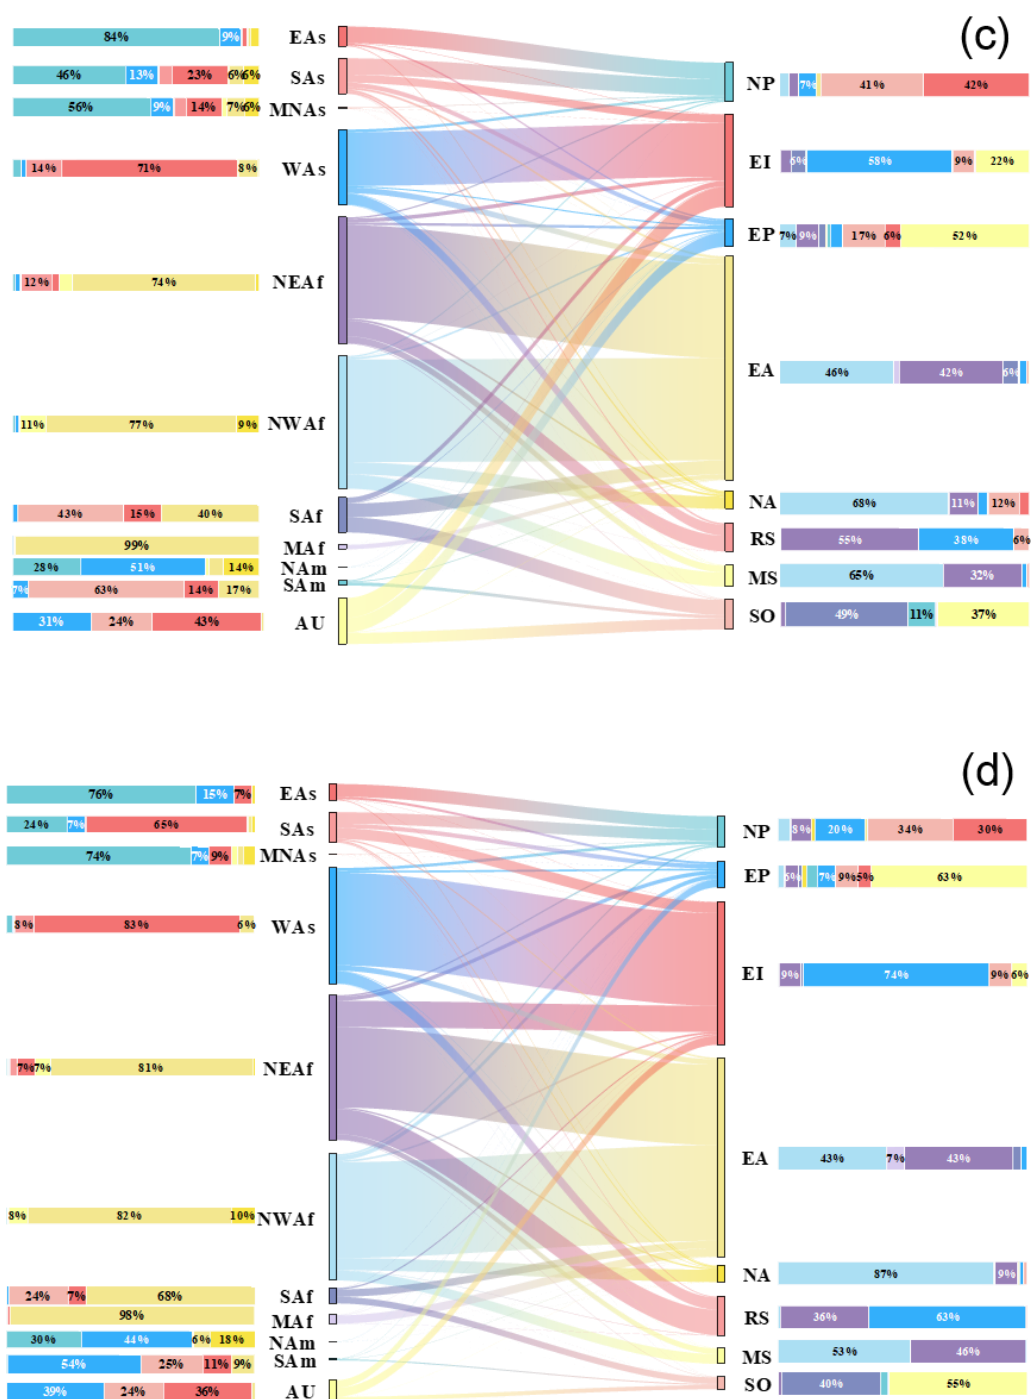

Fig. S10 The seasonal contribution of various dust source regions to the carbon uptake of oceans (a) spring; (b) summer; (c) autumn; (d) winter

The left lateral columns are the proportions of dust from each dust source to induce marine carbon uptake over each ocean, with different colors representing different oceans. The right lateral columns illustrate the contributions from various dust sources to marine carbon uptake over each ocean, different color corresponding to different dust sources. The longitudinal columns display the contribution ratios of dust sources or oceans to the total marine carbon uptake driven by dust deposition. The lines in the middle illustrate the transport direction and intensity.

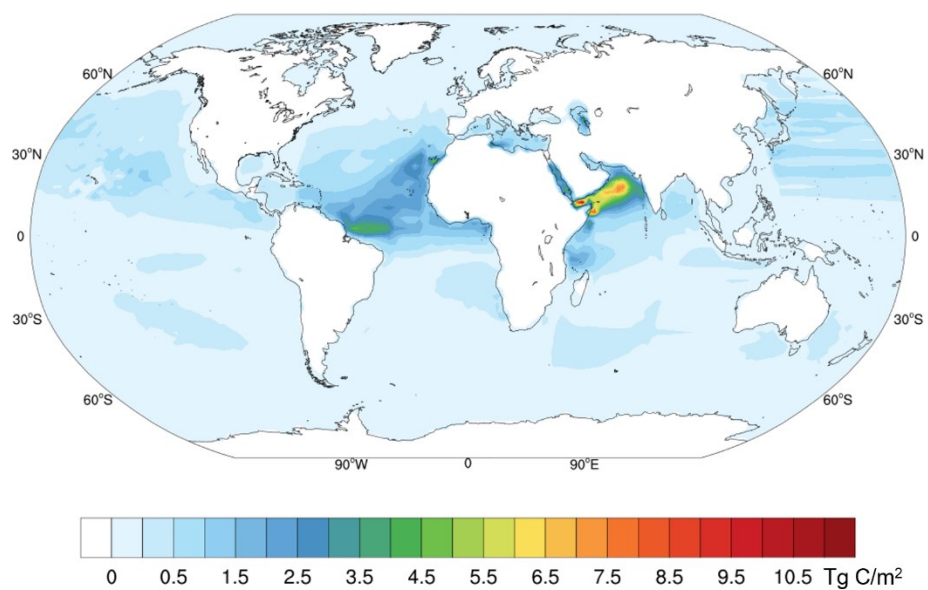

Fig. S11 The annual marine carbon uptake for new growth induced by dust deposition calculated by CMIP6 dissolved iron data.
